# Supplementary material for: Bio-Based Polymer Developments from Tall Oil Fatty Acids by Exploiting Michael Addition
Source: MDPI journal article supplement (doi:10.3390/polym14194068), 2022-09-28
Supplement: s1 [file s1]

**Table S1.** Characteristics (glass transition temperatures ( $T_g$ ) by DMA, tensile (Young's) modulus ( $E'$ ), tensile strength and cross-link density ( $v_e$ ) of selected polymers for comparison.

| Materials(raw materials, short preparation method)                                                                                                                                                                                                                                                                                           | Samples                                             | Characteristics |              |                       |                              | Ref. |
|----------------------------------------------------------------------------------------------------------------------------------------------------------------------------------------------------------------------------------------------------------------------------------------------------------------------------------------------|-----------------------------------------------------|-----------------|--------------|-----------------------|------------------------------|------|
|                                                                                                                                                                                                                                                                                                                                              |                                                     | $T_g$ (DMA), °C | $E'$ , (MPa) | Tensile strength, MPa | $v_e$ , mol·cm <sup>-3</sup> |      |
| On the basis of acetoacetylated soybean oil (AASBO), several bio-based coating materials were prepared using different aromatic dicarboxaldehydes (1,2-benzenedialdehyde (1,2-BDA), 1,3-benzenedialdehyde (1,3-BDA), 1,4-phthalaldehyde (1,4-BDA), 4,4'-biphenyldicarboxaldehyde (4,4'-BPDA))                                                | AASBO with 1,2-BDA                                  | 38              | 2.76         | 1.44                  | $1.4 \cdot 10^{-5}$          | [39] |
|                                                                                                                                                                                                                                                                                                                                              | AASBO with 1,3-BDA                                  | 39              | 6.27         | 3.54                  | $3.5 \cdot 10^{-5}$          |      |
|                                                                                                                                                                                                                                                                                                                                              | AASBO with 1,4-BDA                                  | 42              | 15.07        | 3.85                  | $8.9 \cdot 10^{-5}$          |      |
|                                                                                                                                                                                                                                                                                                                                              | AASBO with 4,4'-BPDA                                | 54              | 24.91        | 5.65                  | $9.0 \cdot 10^{-5}$          |      |
| Film materials prepared from acetoacetylated castor oil or modified castor oil (modified by different amount of 2-mercaptoethanol (Castrol oil:2-mercaptoethanol: 0.01:0.015 and 0.01:0.03)) and 4,4-diaminocyclohexylmethane (PACM) by Michael addition reaction                                                                            | Film from acetoacetylated castor oil and PACM       | 2               | 0.028        | 0.68                  | $0.097 \cdot 10^{-3}$        | [43] |
|                                                                                                                                                                                                                                                                                                                                              | Film from modified castor oil (0.01:0.015) and PACM | 27.6            | 0.041        | 1.06                  | $0.17 \cdot 10^{-3}$         |      |
|                                                                                                                                                                                                                                                                                                                                              | Film from modified castor oil (0.01:0.015) and PACM | 33.1            | 0.18         | 1.75                  | $0.27 \cdot 10^{-3}$         |      |
| Polyurethane (PU) films prepared from epoxidized soybean oil (ESBO) and epoxidized linseed oil (ELO) ring-opened by polyhydroxy fatty acids. Polyols were identified as SMS, SGS, LMS, and LGS, where the first letter "S" – ESBO, "L" – ELO; the second letter "M" – methanol, "G" – glycol; "S" refers to ESBO ring-opened by fatty acids. | SMS-PU                                              | 39.3            | 67.2         | 8.6                   | $0.0374 \cdot 10^{-3}$       | [5]  |
|                                                                                                                                                                                                                                                                                                                                              | SGS-PU                                              | 49.9            | 123.4        | 11.5                  | $0.103 \cdot 10^{-3}$        |      |
|                                                                                                                                                                                                                                                                                                                                              | LMS-PU                                              | 63.4            | 166.6        | 13.5                  | $0.31 \cdot 10^{-3}$         |      |
|                                                                                                                                                                                                                                                                                                                                              | LGS-PU                                              | 80.5            | 315          | 17.2                  | $0.91 \cdot 10^{-3}$         |      |
| Bisphenol A epoxy resin was modified with a dimeric fatty acid and diglycidyl groups. The prepared polyol was mixed with polypropylene glycol and reacted with isophorone diisocyanate                                                                                                                                                       | PU                                                  | 108             | 2035         | ~68                   | $1.03 \cdot 10^{-3}$         | [52] |
| Hydroxyl-terminated fourth-generation hyperbranched polyester was synthesized from glycerol, 2,2-bis(Hydroxymethyl) propionic acid, 3-isocyanatopropyl triethoxysilane                                                                                                                                                                       | PU                                                  | 116.6           | 293          |                       | $2.97 \cdot 10^{-3}$         | [53] |
| Vinylogous urethane vitrimer derived from renewable castor oil and DL-limonene                                                                                                                                                                                                                                                               | PU vitrimers                                        | 48              | 27.2         | 5.5                   | $0.99 \cdot 10^{-3}$         | [74] |
| Non-isocyanate polyurethane (NIPU) prepared from hexamethylene diamine and glycerol cyclic carbonates, trimethylolpropane                                                                                                                                                                                                                    | NIPU                                                |                 | 2100         | 68                    |                              | [15] |

| Materials(raw materials, short preparation method)                                                                                                                                 | Samples                          | Characteristics          |           |                       |                                       | Ref. |
|------------------------------------------------------------------------------------------------------------------------------------------------------------------------------------|----------------------------------|--------------------------|-----------|-----------------------|---------------------------------------|------|
|                                                                                                                                                                                    |                                  | T <sub>g</sub> (DMA), °C | E', (MPa) | Tensile strength, MPa | v <sub>e</sub> , mol·cm <sup>-3</sup> |      |
| NIPU prepared by curing carbonated soybean (CSBO) and linseed (CLSO) oils with different diamines (1,2-ethane diamine (EDA), 1,4-butane diamine (BDA), isophorone diamine (IPDA) ) | NIPU (CSBO-EDA)                  | 20                       | 6         | 4                     |                                       | [75] |
|                                                                                                                                                                                    | NIPU (CSBO-BDA)                  | 17                       | 2         | 2                     |                                       |      |
|                                                                                                                                                                                    | NIPU (CSBO-IPDA)                 | 40                       | 50        | 5                     |                                       |      |
|                                                                                                                                                                                    | NIPU ( CLSO-EDA)                 | 55                       | 180       | 18                    |                                       |      |
|                                                                                                                                                                                    | NIPU ( CLSO-BDA)                 | 45                       | 300       | 17                    |                                       |      |
|                                                                                                                                                                                    | NIPU ( CLSO-IPDA)                | 60                       | 1460      | 10                    |                                       |      |
| Methyl methacrylate (MMA)                                                                                                                                                          | Poly(methyl methacrylate) (PMMA) |                          | 2700      | 55                    |                                       | [68] |
| MMA                                                                                                                                                                                | PMMA                             | 126.5                    | 1514      |                       | 0.081·10 <sup>-3</sup>                | [56] |
